# Supplementary material
Source: MDPI journal article supplement (https://www.mdpi.com/2073-4441/9/6/449)
Supplement: s1 [file s1]

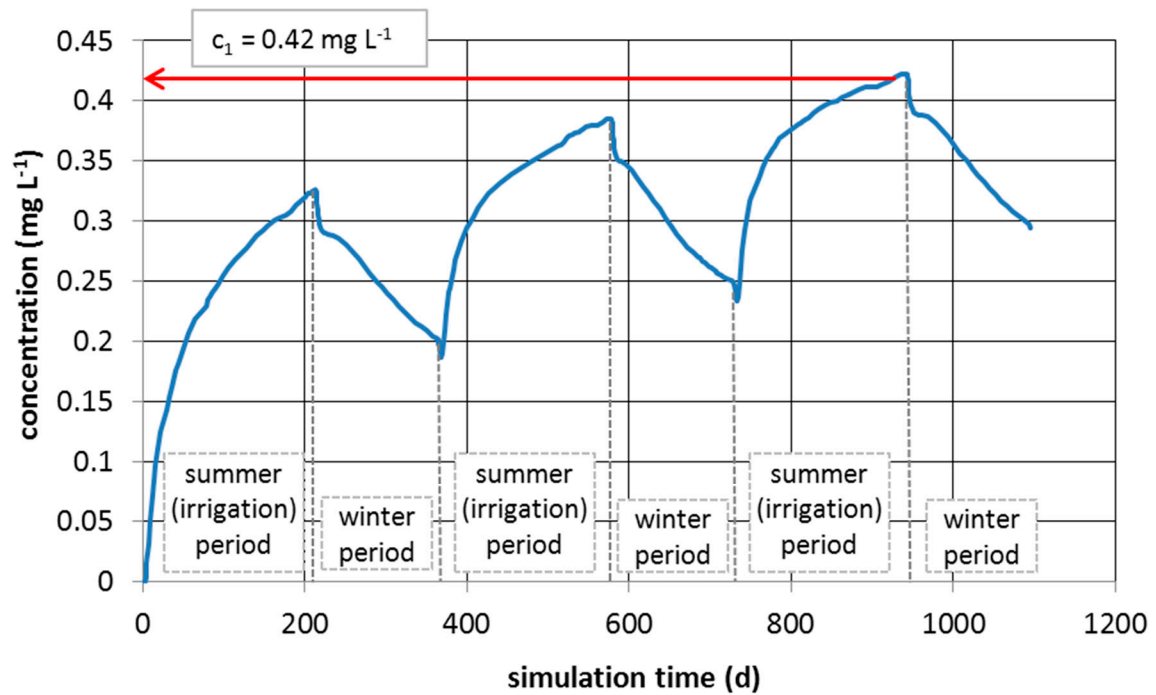

$c_0 = 1 \text{ mg L}^{-1}$ ,  $c_1 = 0.42 \text{ mg L}^{-1}$

- ➔ dilution =  $c_0/c_1 = 2.4$
- ➔ dilution with groundwater ca. 1:2.4
- ➔ dilution with surface water ca. 1:10
- ➔ **total dilution ca. 1:24**

**Supplementary Figure S1:** Simulated concentration at the reference plot G4 in 2 m depth. Irrigation was in the summer period only. Simulation was conducted with FEFLOW (DHI-Wasy).
